# Supplementary material for: Gruel Creep Feeding Accelerates Growth and Alters Intestinal Health of Young Pigs
Source: MDPI journal article supplement (doi:10.3390/ani12182408), 2022-09-14
Supplement: s1 [file s1]

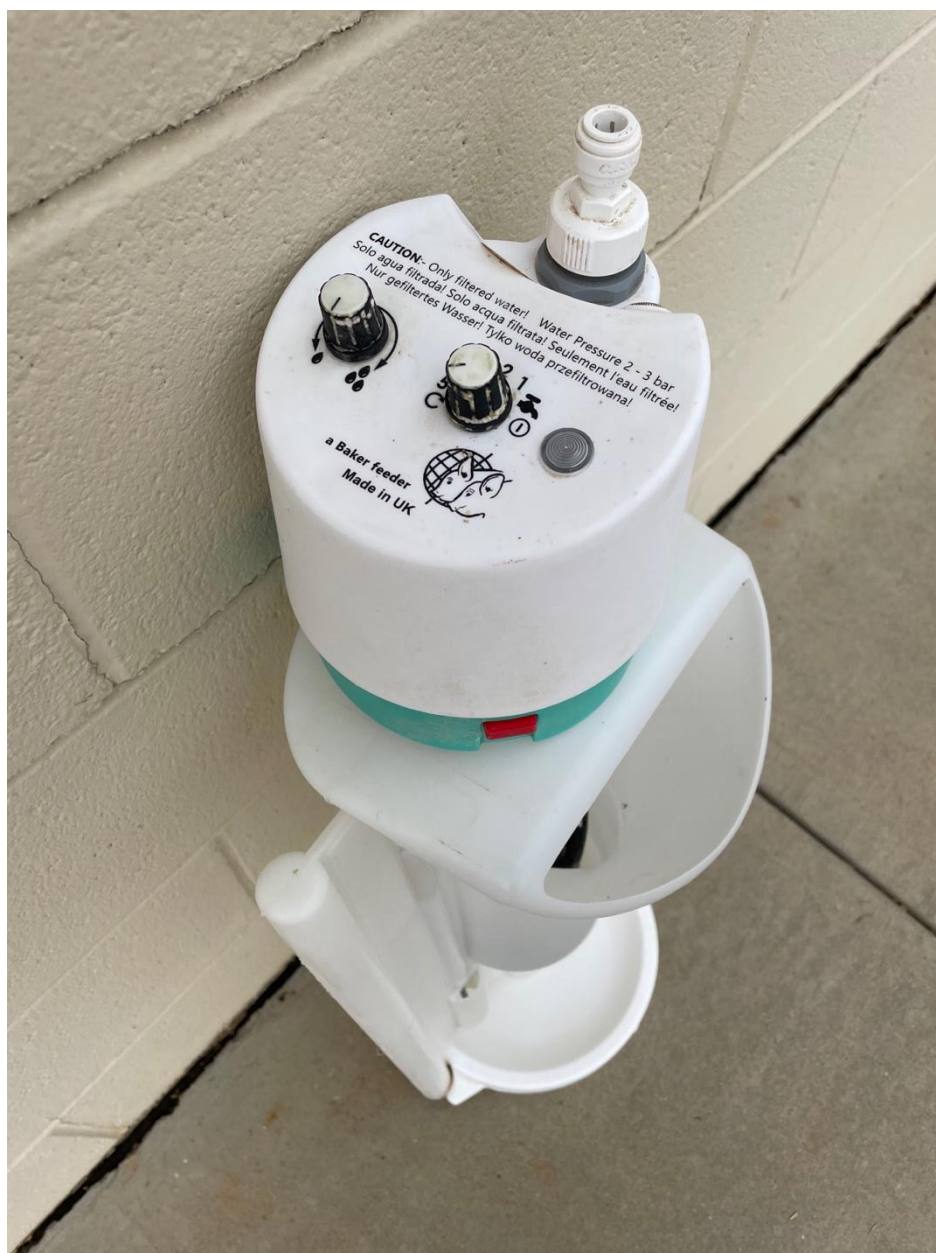

Supplementary Figure S1. Minitransition Feeder used to deliver gruel creep feeds

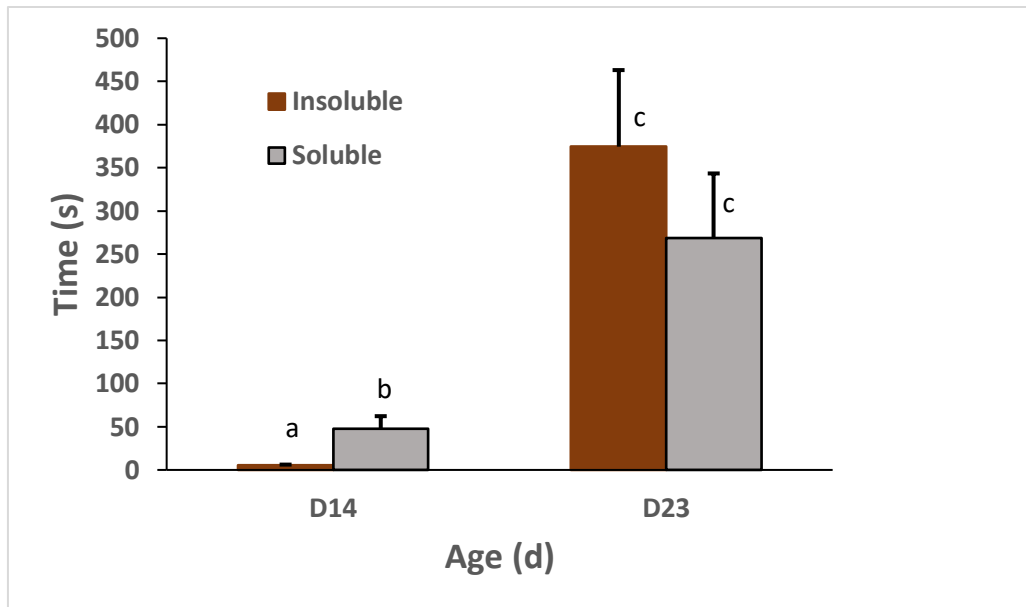

**Supplemental Figure S2.** Video-recorded feeding behavior of suckling pigs supplemented with insoluble or soluble gruel creep feed observed at 14 and 23 days of age. Means represent the time that piglets occupied feeder space,  $n = 6$  litters/diet. <sup>a</sup>, <sup>b</sup>, <sup>c</sup> Bars within an age lacking a common superscript differ,  $p < 0.05$ .

**Supplementary Table S1.** Cytokine levels in piglets fed soluble or insoluble gruel creep feed diets, measured before (D22) and after weaning (D31) compared with non-creep-fed controls<sup>1</sup>

| <i>Items (pg/ml)</i> | Treatment            |                   |                    |                  |                   |                     | <i>P</i> > F |                  |      |                    |
|----------------------|----------------------|-------------------|--------------------|------------------|-------------------|---------------------|--------------|------------------|------|--------------------|
|                      | Control              |                   | Insoluble          |                  | Soluble           |                     | SEM          | Trt <sup>2</sup> | Age  | T X A <sup>3</sup> |
|                      | <i>D20</i>           | <i>D31</i>        | <i>D20</i>         | <i>D31</i>       | <i>D20</i>        | <i>D31</i>          |              |                  |      |                    |
| <i>GM-CSF</i>        | 72                   | 21                | 75                 | 47               | 37                | 39                  | 30.7         | 0.76             | 0.32 | 0.69               |
| <i>IFNλ</i>          | 8,543                | 5,627             | 6,117              | 5,346            | 6,703             | 6,533               | 967          | 0.38             | 0.11 | 0.34               |
| <i>IL-1α</i>         | 43 <sup>a</sup>      | 12 <sup>b</sup>   | 13 <sup>b</sup>    | 9 <sup>b</sup>   | 11 <sup>b</sup>   | 45 <sup>a</sup>     | 10.5         | 0.19             | 0.99 | 0.02               |
| <i>IL-1β</i>         | 541 <sup>a</sup>     | 118 <sup>b</sup>  | 133 <sup>b</sup>   | 119 <sup>b</sup> | 104 <sup>b</sup>  | 494 <sup>a</sup>    | 103          | 0.12             | 0.86 | 0.01               |
| <i>IL-1ra</i>        | 477                  | 483               | 404                | 566              | 302               | 1,004               | 172          | 0.53             | 0.05 | 0.12               |
| <i>IL-2</i>          | 370 <sup>a</sup>     | 97 <sup>c</sup>   | 133 <sup>abc</sup> | 90 <sup>c</sup>  | 102 <sup>bc</sup> | 290 <sup>ab</sup>   | 85           | 0.35             | 0.54 | 0.04               |
| <i>IL-4</i>          | 1,169 <sup>abc</sup> | 204 <sup>c</sup>  | 323 <sup>bc</sup>  | 209 <sup>c</sup> | 228 <sup>c</sup>  | 1,372 <sup>ab</sup> | 375          | 0.35             | 0.95 | 0.03               |
| <i>IL-6</i>          | 174 <sup>a</sup>     | 45 <sup>b</sup>   | 54 <sup>b</sup>    | 44 <sup>b</sup>  | 49 <sup>b</sup>   | 102 <sup>ab</sup>   | 35.8         | 0.26             | 0.33 | 0.05               |
| <i>IL-8</i>          | 121                  | 99                | 103                | 113              | 92                | 106                 | 13.6         | 0.70             | 0.97 | 0.35               |
| <i>IL-10</i>         | 915 <sup>a</sup>     | 274 <sup>b</sup>  | 280 <sup>b</sup>   | 213 <sup>b</sup> | 236 <sup>b</sup>  | 604 <sup>ab</sup>   | 201          | 0.24             | 0.50 | 0.06               |
| <i>IL-12</i>         | 439                  | 603               | 458                | 842              | 504               | 650                 | 102          | 0.46             | 0.01 | 0.44               |
| <i>IL-18</i>         | 2,291 <sup>a</sup>   | 914 <sup>bc</sup> | 926 <sup>bc</sup>  | 767 <sup>c</sup> | 912 <sup>bc</sup> | 2,025 <sup>ab</sup> | 417          | 0.17             | 0.68 | 0.02               |
| <i>TNFα</i>          | 382                  | 112               | 218                | 158              | 150               | 184                 | 127          | 0.81             | 0.35 | 0.49               |

<sup>1</sup>One pig per litter was sampled at weaning (D22) or at one-week post-weaning (D31).

<sup>2</sup>Treatment.

<sup>3</sup>Treatment × Age

<sup>abc</sup>Means within a row lacking a common superscript differ (*P* < 0.05)
